# Supplementary material for: The impact of increasing dose on overall survival in prostate cancer
Source: Springer Nature journal article supplement (doi:10.1186/s13014-015-0419-3), 2015-05-20
Supplement: MOESM1 [file 9773846]

## Appendix 1

Hazard ratios for overall survival on multivariate analysis for patients in the Surveillance, Epidemiology, and End Results (SEER) database and the National Oncology Data Alliance (NODA) from 1995-2006 with variates common to both datasets.

**Table 3** Hazard Ratios for Overall Survival

|                       |                               | SEER    |      |              | NODA    |      |              |
|-----------------------|-------------------------------|---------|------|--------------|---------|------|--------------|
|                       |                               | p-value | H.R. | 95% C.I.     | p-value | H.R. | 95% C.I.     |
| <b>T stage</b>        | T1                            | <0.001  | --   |              | <0.001  | --   |              |
|                       | T2                            | <0.001  | 1.15 | [1.12, 1.18] | <0.001  | 1.21 | [1.16, 1.27] |
|                       | T3                            | <0.001  | 1.49 | [1.41, 1.57] | <0.001  | 1.42 | [1.30, 1.54] |
|                       | T4                            | <0.001  | 2.42 | [2.14, 2.74] | <0.001  | 2.41 | [1.93, 3.01] |
| <b>Age</b>            | (Continuous)                  | <0.001  | 1.05 | [1.05, 1.06] | <0.001  | 1.05 | [1.04, 1.05] |
| <b>Marital Status</b> | Unmarried                     |         | --   |              |         | --   |              |
|                       | Married                       | <0.001  | 0.76 | [0.74, 0.78] | <0.001  | 0.81 | [0.77, 0.86] |
| <b>Grade</b>          | (1) Well Differentiated       | <0.001  | --   |              | <0.001  | --   |              |
|                       | (2) Moderately Differentiated | 0.516   | 1.02 | [0.96, 1.09] | 0.337   | 1.05 | [0.95, 1.15] |
|                       | (3) Poorly Differentiated     | <0.001  | 1.36 | [1.27, 1.45] | <0.001  | 1.27 | [1.16, 1.40] |
|                       | (4) Anaplastic                | <0.001  | 1.88 | [1.55, 2.28] | 0.010   | 1.58 | [1.12, 2.24] |

## Appendix 2

From Lin et al, "The proportional hazards regression (Cox, 1972) specifies that the hazard functions of T conditional on the sets of covariates (X, Z, U) and (X, Z) are, respectively,

$$\lambda(t|X, Z, U) = \lambda_o(t) \cdot \exp(\beta \cdot X + \gamma X \cdot U + \theta \cdot Z)$$

and

$$\lambda(t|X, Z, U) = \lambda_o^*(t) \cdot \exp(\beta^* \cdot X + \theta^* \cdot Z)$$

where  $\lambda_o(\cdot)$  and  $\lambda_o^*(\cdot)$  are arbitrary baseline hazard functions, and  $(\beta, \gamma_0, \gamma_1, \theta)$  and  $(\beta^*, \theta^*)$  are unknown regression parameters." X is the variate of interest, in this case dose, Z is a vector of other measured covariates, and U is an unmeasured confounder.  $\beta^*$  and  $\theta^*$  represent the estimated parameter values determined in the absence of knowledge of the confounder. We assume that X and U take the value (0,1), where dose X=0 is the referent group, 1 is a nonreferent dose group, and U=0 and 1 represent the absence or presence of the confounder, respectively. We assume  $\gamma_0 = \gamma_1 = \gamma$ , meaning that the effect of the confounder is independent of dose.

Lin goes on to show that

$$\beta \approx \beta^* - \ln \left( \frac{e^\gamma P_1 + (1 - P_1)}{e^\gamma P_0 + (1 - P_0)} \right)$$

where  $P_0$  and  $P_1$  are the prevalences of the confounder in the 0 and 1 dose groups respectively. Assuming equality, it can be shown that

$$\frac{HR_{dose}}{HR_{dose}^*} = \frac{HR_{confounder} P_0 + (1 - P_0)}{HR_{confounder} P_1 + (1 - P_1)}$$

If we assume that confounding accounts for all the dose response, then  $HR_{dose}=1$ . For  $P_1=P_{high}$  and  $P_0=P_{low}$ , we obtain equation (1) in the text.
